# Supplementary material for: Zwitterionic poly(sulfobetaine methacrylate) hydrogels incorporated with angiogenic peptides promote differentiation of human adipose-derived stem cells
Source: Royal Society of Chemistry journal article supplement (doi:10.1039/c7ra08919h), 2017-01-01
Supplement: c7ra08919h1.pdf [file c7ra08919h1.pdf]

## Supplementary material

**Figure S1** The  $^1\text{H}$  NMR spectrums of PSBMA.

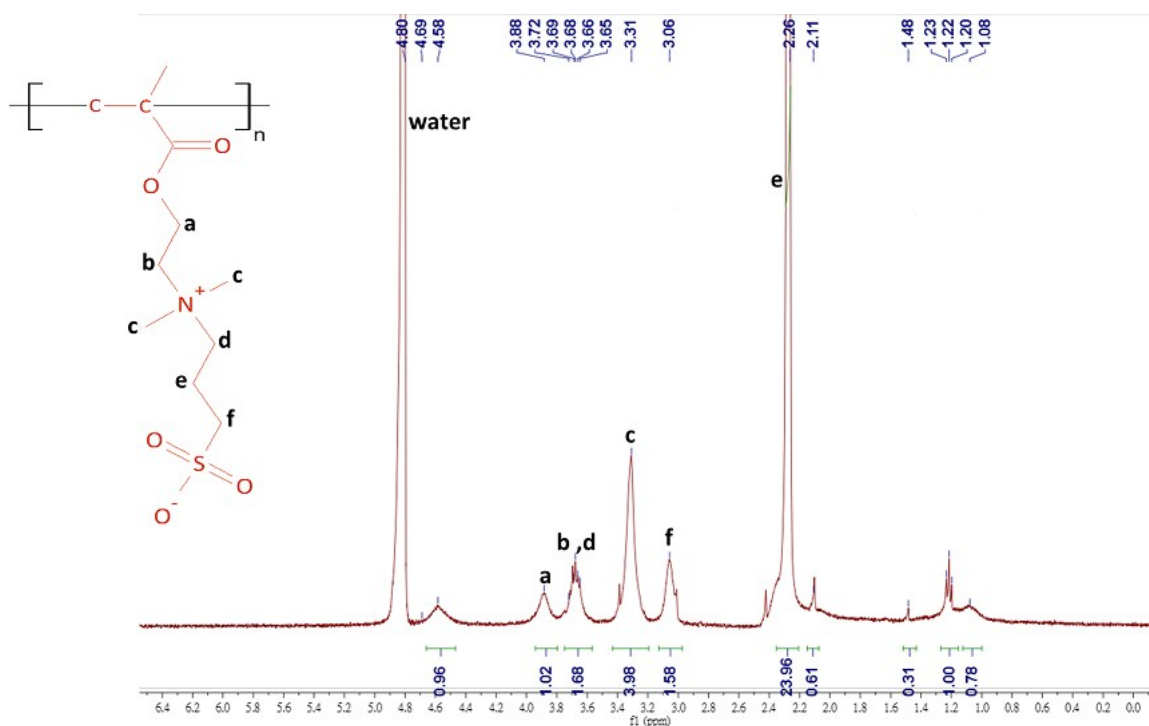

The content of PSBMA was determined from the  $^1\text{H}$  NMR spectrum according to the peak ratio of the methyl protons at 3.2–3.4 ppm, the methylene protons of the polymer main chain at 2.0–2.4 ppm and the methylene protons adjacent to the oxygen at 3.6–4.0 ppm as shown in Figure S1.

**Figure S2** The  $^1\text{H}$  NMR spectrums of PSBMA-RGD.

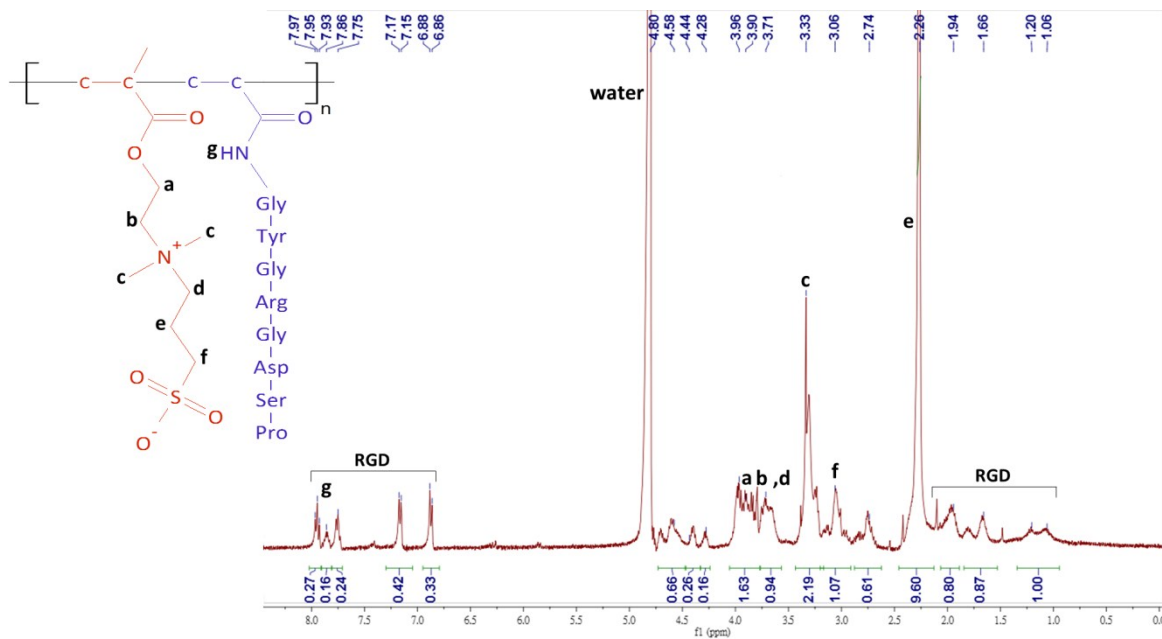

The content of PSBMA-RGD was determined from the  $^1\text{H}$  NMR spectrum according to the peak ratio of the amine protons adjacent to the nitrogen atom at 7.7-7.9 ppm (g), and other protons of RGD at 1.0-2.3 ppm, as shown in Figure S2.

**Figure S3** The  $^1\text{H}$  NMR spectrums of PSBMA-RGD/QK.

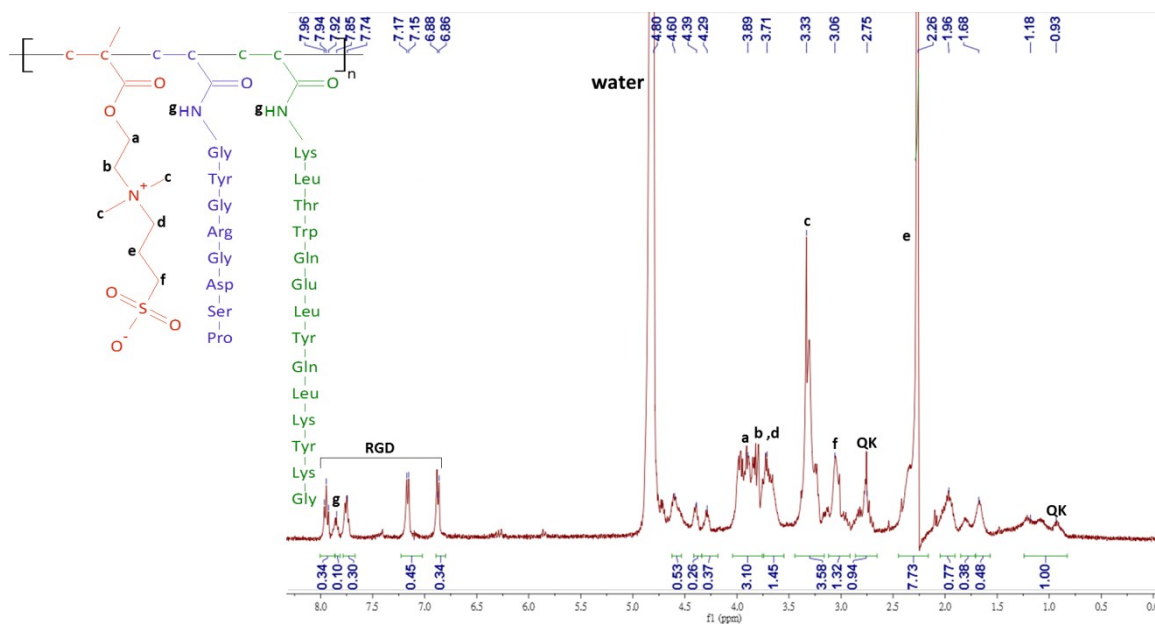

The content of PSBMA-RGD/QK was determined from the  $^1\text{H}$  NMR spectrum according to the peak ratio of the amine protons adjacent to the nitrogen atom at 7.7-7.9 ppm (g), and other protons of QK at 0.8 and 3.3 ppm, as shown in Figure S3.

**Figure S4** Protein adsorptions to PSBMA, PSBMA-RGD, and PSBMA-RGD/QK hydrogels.

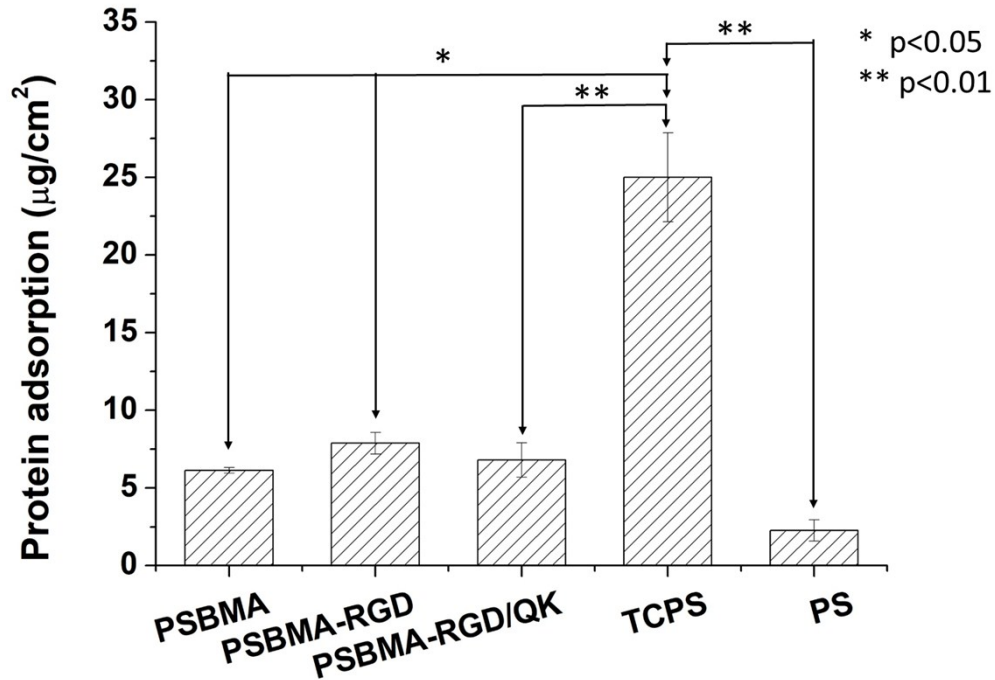

The adsorbed proteins in PSBMA, PSBMA-RGD, and PSBMA-RGD/QK hydrogels were desorbed by SDS and quantified by BCA kit. The protein adsorption to TCPS was significantly higher than those of PSBMA hydrogels, peptides-incorporated PSBMA hydrogels, and PS. However, there was no significant difference in the amounts of protein adsorption among PSBMA hydrogels groups.
